# Supplementary material for: Optimizing Nitrogen Application for Jojoba under Intensive Cultivation
Source: MDPI journal article supplement (doi:10.3390/plants12173132), 2023-08-31
Supplement: s1 [file s1]

**Table S1.** Effect of N fertilization rate on old (O) and young (Y) leaf mineral composition. NS, not significant; \* significant ( $p < 0.05$ , Tukey- HSD); /, mineral concentration not measured. Different letters indicate significant differences ( $p < 0.05$ , Tukey-HSD) between treatments.

| Treatment | Ca      | Mg   | Na     | Cl      | S       | B           | Cu      | Fe     | Mn       | Zn    | Mo      |
|-----------|---------|------|--------|---------|---------|-------------|---------|--------|----------|-------|---------|
|           | %       |      |        |         |         | mg/kg (ppm) |         |        |          |       |         |
| 2016 O    |         |      |        |         |         |             |         |        |          |       |         |
| N50       | 0.73    | 0.88 | 0.06   | 1.82    | /       | 81.43       | 4.34    | 69.76  | 68.46    | /     | /       |
| N150      | 0.79    | 0.89 | 0.06   | 1.87    | /       | 79.32       | 4.00    | 60.53  | 57.98    | /     | /       |
| N250      | 0.79    | 0.84 | 0.06   | 1.75    | /       | 81.77       | 4.10    | 72.37  | 53.10    | /     | /       |
| N370      | 0.77    | 0.86 | 0.06   | 1.84    | /       | 76.86       | 3.74    | 67.65  | 74.29    | /     | /       |
| N500      | 0.72    | 0.88 | 0.07   | 1.74    | /       | 83.25       | 3.99    | 66.95  | 62.56    | /     | /       |
| p<0.05    | NS      | NS   | NS     | NS      |         | NS          | NS      | NS     | NS       |       |         |
| 2018 O    |         |      |        |         |         |             |         |        |          |       |         |
| N50       | 0.98    | 0.90 | 0.12   | 1.57    | 0.20    | 570.44      | 7.24    | 117.20 | 94.62 A  | 11.39 | /       |
| N150      | 0.93    | 0.84 | 0.09   | 1.58    | 0.21    | 507.45      | 6.43    | 117.30 | 73.91 AB | 9.67  | /       |
| N250      | 0.96    | 0.84 | 0.11   | 1.51    | 0.22    | 486.17      | 8.00    | 122.04 | 83.08 AB | 11.07 | /       |
| N370      | 1.11    | 0.79 | 0.15   | 1.41    | 0.23    | 508.77      | 6.74    | 116.89 | 57.32 B  | 10.12 | /       |
| N500      | 0.93    | 0.78 | 0.10   | 1.44    | 0.23    | 577.00      | 6.46    | 105.28 | 76.34 AB | 9.60  | /       |
| p<0.05    | NS      | NS   | NS     | NS      | NS      | NS          | NS      | NS     | *        | NS    |         |
| 2018 Y    |         |      |        |         |         |             |         |        |          |       |         |
| N50       | 0.68 C  | 0.80 | 0.05   | 1.87 A  | 0.19    | 332.25      | 4.06 A  | 40.61  | 93.71 A  | 17.47 | /       |
| N150      | 0.79 BC | 0.79 | 0.04   | 1.75 AB | 0.19    | 429.95      | 3.24 AB | 42.47  | 75.72 AB | 13.82 | /       |
| N250      | 0.80 B  | 0.81 | 0.04   | 1.83 AB | 0.20    | 475.58      | 3.92 AB | 38.26  | 87.88 AB | 15.96 | /       |
| N370      | 0.94 A  | 0.74 | 0.05   | 1.59 B  | 0.20    | 490.60      | 3.47 AB | 36.89  | 56.94 B  | 15.91 | /       |
| N500      | 0.84 AB | 0.76 | 0.04   | 1.74 AB | 0.20    | 429.18      | 3.04 B  | 37.57  | 78.38 AB | 13.91 | /       |
| p<0.05    | *       | NS   | NS     | *       | NS      | NS          | *       | NS     | *        | NS    |         |
| 2020 O    |         |      |        |         |         |             |         |        |          |       |         |
| N50       | 1.12    | 1.00 | 0.19   | 1.57    | 0.17 B  | 89.30       | 7.54 A  | 91.47  | 116.11   | 11.94 | 2.24 A  |
| N150      | 1.12    | 0.92 | 0.18   | 1.57    | 0.21 A  | 82.41       | 6.95 A  | 81.59  | 85.60    | 12.58 | 1.86 AB |
| N250      | 1.29    | 1.01 | 0.18   | 1.45    | 0.19 AB | 90.76       | 6.91 A  | 95.11  | 106.79   | 11.92 | 1.47 BC |
| N370      | 1.38    | 0.98 | 0.19   | 1.53    | 0.2 AB  | 81.45       | 5.29 B  | 72.77  | 95.10    | 10.45 | 1.16 C  |
| N500      | 1.33    | 0.98 | 0.15   | 1.60    | 0.22 A  | 80.82       | 4.87 B  | 75.68  | 106.55   | 13.06 | 1.26 C  |
| p<0.05    | NS      | NS   | NS     | NS      | *       | NS          | *       | NS     | NS       | NS    | *       |
| 2020 Y    |         |      |        |         |         |             |         |        |          |       |         |
| N50       | 0.79 B  | 0.75 | 0.07 A | 1.91    | 0.21 B  | 50.73       | 4.79 A  | 36.14  | 54.89 B  | 21.89 | 1.93 A  |
| N150      | 0.89 AB | 0.81 | 0.05 B | 1.99    | 0.26 A  | 41.45       | 3.56 B  | 37.92  | 50.17 B  | 22.91 | 1.71 AB |
| N250      | 0.92 AB | 0.83 | 0.04 B | 2.13    | 0.22 AB | 44.25       | 3.79 B  | 36.54  | 73.8 AB  | 20.91 | 1.41 BC |
| N370      | 1.02 A  | 0.84 | 0.04 B | 2.00    | 0.22 AB | 42.70       | 3.06 BC | 32.06  | 99.8 A   | 19.65 | 1.14 C  |
| N500      | 0.95 AB | 0.81 | 0.04 B | 2.25    | 0.23 AB | 39.27       | 2.62 C  | 33.60  | 76.27 AB | 19.58 | 1.27 C  |
| p<0.05    | *       | NS   | *      | NS      | *       | NS          | *       | NS     | *        | NS    | *       |
